# Supplementary material for: Do Ruminal Ciliates Select Their Preys and Prokaryotic Symbionts?
Source: PubMed Central journal article supplement (PMC6079354; doi:10.3389/fmicb.2018.01710), 2018-07-31
Supplement: Data_Sheet_1.pdf [file Data_Sheet_1.pdf]

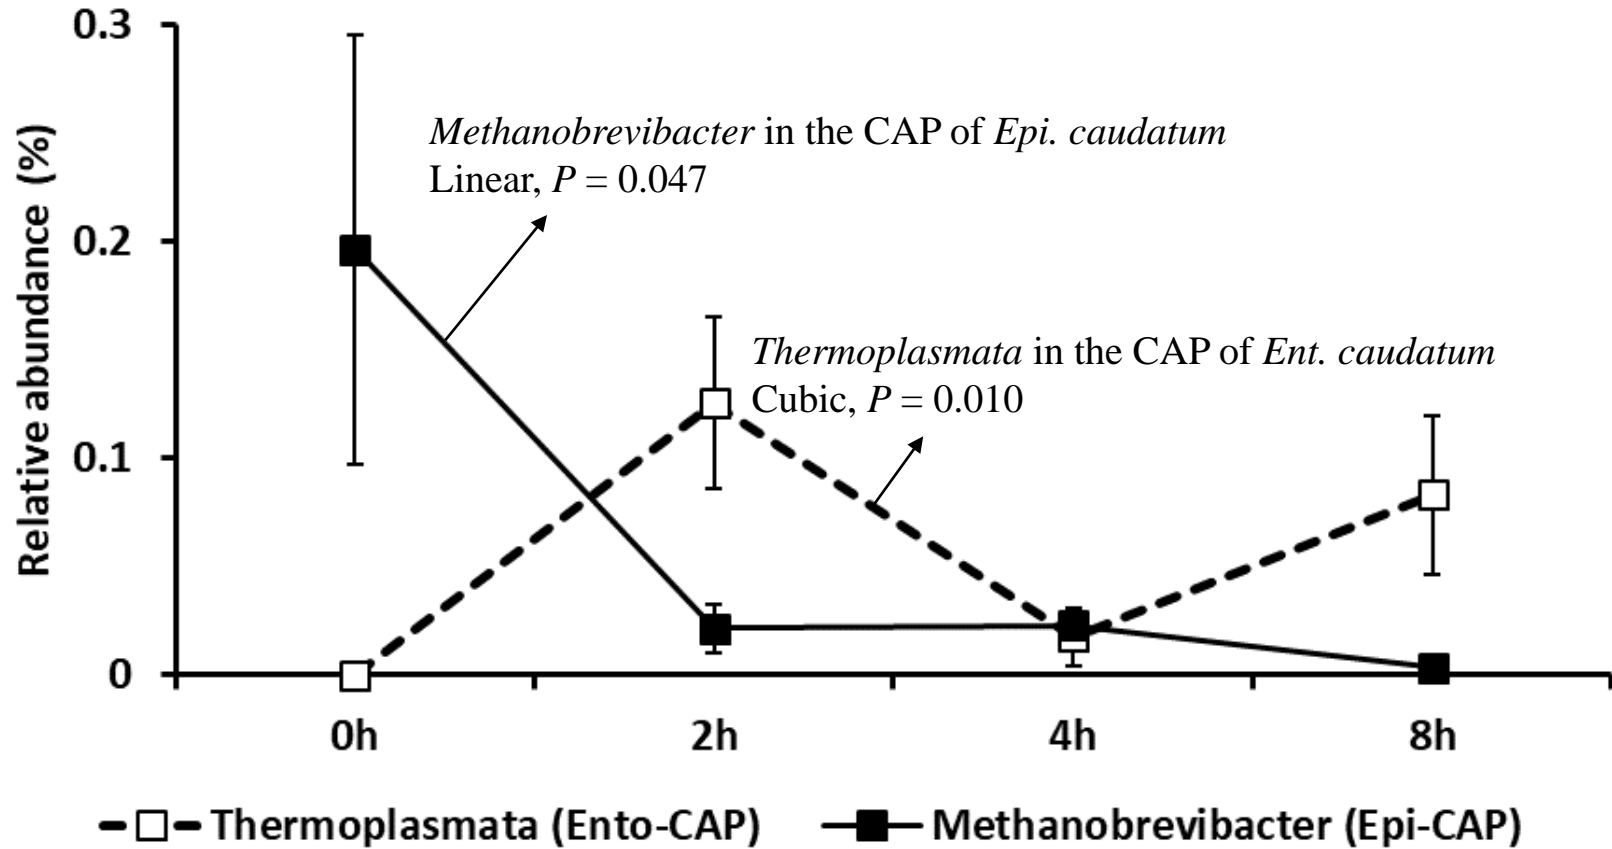

**Figure S1.** Methanogens taxa in the CAP of monocultures of *Ent. caudatum* and *Epi. caudatum* that showed significant temporal changes in relative abundances after feeding.
